# Supplementary material for: Genome Size, Chromosome Number and Morphological Data Reveal Unexpected Infraspecific Variability in Festuca (Poaceae)
Source: MDPI journal article supplement (doi:10.3390/genes12060906), 2021-06-11
Supplement: s1 [file s1]

**Supplementary Table S1.** Summary of morphological variation in *Festuca yvesii* subsp. *summilusitana* and *F. yvesii* subsp. *lagascae* according to ploidy level. Mean, minimum and maximum values, standard deviation and coefficient of variation (%) were calculated for each character and ploidy level. Statistical differences and post-hoc test among cytotypes are provided.

| Character                 | Subspecies                  | Ploidy level | Min-Max     | Media | Sd    | CV (%) | p-value | Post-hoc test               |
|---------------------------|-----------------------------|--------------|-------------|-------|-------|--------|---------|-----------------------------|
| Culm length (cm)          | subsp. <i>summilusitana</i> | 10x          | 16.20-51.00 | 33.45 | 9.89  | 29.57  | < 0.001 | a<br>b<br>b<br>a<br>ab<br>b |
|                           |                             | 12x          | 15.00-51.33 | 31.50 | 10.94 | 34.73  |         |                             |
|                           |                             | 14x          | 23.71-50.00 | 34.21 | 7.34  | 21.46  |         |                             |
|                           | subsp. <i>lagascae</i>      | 6x           | 10.00-22.00 | 16.08 | 3.74  | 23.26  |         |                             |
|                           |                             | 8x           | 11.50-35.10 | 23.27 | 6.87  | 29.52  |         |                             |
|                           |                             | 10x          | 20.17-32.00 | 26.86 | 4.46  | 16.60  |         |                             |
| Leaf length (cm)          | subsp. <i>summilusitana</i> | 10x          | 4.00-18.00  | 9.56  | 3.69  | 38.60  | 0.027   | a                           |
|                           |                             | 12x          | 2.57-16.35  | 7.13  | 3.28  | 46.00  | 0.008   | ab                          |
|                           |                             | 14x          | 3.50-13.00  | 7.00  | 2.37  | 33.86  |         | b                           |
|                           | subsp. <i>lagascae</i>      | 6x           | 2.00-8.00   | 3.87  | 1.58  | 40.83  |         | a                           |
|                           |                             | 8x           | 1.97-9.43   | 4.87  | 1.97  | 40.45  |         | ab                          |
|                           |                             | 10x          | 4.00-9.30   | 6.65  | 1.75  | 26.32  |         | b                           |
| Leaf diameter (mm)        | subsp. <i>summilusitana</i> | 10x          | 0.66-1.10   | 0.82  | 0.12  | 14.63  | < 0.001 | a<br>b<br>b<br>a<br>b<br>b  |
|                           |                             | 12x          | 0.67-1.05   | 0.87  | 0.11  | 12.64  |         |                             |
|                           |                             | 14x          | 0.70-1.13   | 0.86  | 0.10  | 11.63  |         |                             |
|                           | subsp. <i>lagascae</i>      | 6x           | 0.55-0.81   | 0.67  | 0.08  | 11.94  |         |                             |
|                           |                             | 8x           | 0.60-1.15   | 0.85  | 0.14  | 16.47  |         |                             |
|                           |                             | 10x          | 0.65-0.93   | 0.83  | 0.11  | 13.25  |         |                             |
| Auricle length (mm)       | subsp. <i>summilusitana</i> | 10x          | 0.10-0.40   | 0.22  | 0.08  | 36.36  | < 0.001 | a<br>b<br>b<br>a<br>b<br>b  |
|                           |                             | 12x          | 0.10-0.50   | 0.22  | 0.09  | 40.91  |         |                             |
|                           |                             | 14x          | 0.10-0.60   | 0.24  | 0.11  | 45.83  |         |                             |
|                           | subsp. <i>lagascae</i>      | 6x           | 0.05-0.20   | 0.13  | 0.05  | 38.46  |         |                             |
|                           |                             | 8x           | 0.10-0.64   | 0.31  | 0.14  | 45.16  |         |                             |
|                           |                             | 10x          | 0.15-0.45   | 0.27  | 0.11  | 40.74  |         |                             |
| Spikelet length (mm)      | subsp. <i>summilusitana</i> | 10x          | 7.00-11.00  | 8.71  | 0.99  | 11.37  | < 0.001 | a<br>b<br>b<br>a<br>b<br>b  |
|                           |                             | 12x          | 7.20-12.00  | 9.22  | 1.07  | 11.61  |         |                             |
|                           |                             | 14x          | 7.90-12.00  | 9.51  | 1.19  | 12.51  |         |                             |
|                           | subsp. <i>lagascae</i>      | 6x           | 5.50-8.75   | 7.24  | 0.83  | 11.46  |         |                             |
|                           |                             | 8x           | 6.50-10.00  | 8.11  | 0.95  | 11.71  |         |                             |
|                           |                             | 10x          | 7.95-9.70   | 8.63  | 0.58  | 6.72   |         |                             |
| Flowers number/spikelet   | subsp. <i>summilusitana</i> | 10x          | 4-6         | 5.08  | 0.79  | 15.55  | 0.048   | a<br>ab<br>b<br>a<br>b<br>b |
|                           |                             | 12x          | 4-6         | 4.81  | 0.82  | 17.05  |         |                             |
|                           |                             | 14x          | 4-6         | 4.48  | 0.61  | 13.62  |         |                             |
|                           | subsp. <i>lagascae</i>      | 6x           | 3-5         | 4.39  | 0.76  | 17.31  |         |                             |
|                           |                             | 8x           | 3-6         | 4.81  | 0.73  | 15.18  |         |                             |
|                           |                             | 10x          | 4-6         | 4.84  | 0.76  | 15.70  |         |                             |
| Upper glume length (mm)   | subsp. <i>summilusitana</i> | 10x          | 2.60-5.63   | 4.39  | 0.59  | 13.44  | 0.006   | a                           |
|                           |                             | 12x          | 4.10-6.40   | 4.83  | 0.47  | 9.73   | 0.003   | b                           |
|                           |                             | 14x          | 4.00-6.80   | 4.89  | 0.61  | 12.47  |         | b                           |
|                           | subsp. <i>lagascae</i>      | 6x           | 3.50-4.70   | 4.03  | 0.42  | 10.42  |         | a                           |
|                           |                             | 8x           | 3.57-4.80   | 4.23  | 0.30  | 7.09   |         | ab                          |
|                           |                             | 10x          | 4.25-5.00   | 4.55  | 0.25  | 5.49   |         | b                           |
| Lemma length (mm)         | subsp. <i>summilusitana</i> | 10x          | 4.50-6.17   | 5.45  | 0.46  | 8.44   | < 0.001 | a                           |
|                           |                             | 12x          | 4.93-6.40   | 5.83  | 0.35  | 6.00   | < 0.001 | b                           |
|                           |                             | 14x          | 5.60-6.80   | 6.18  | 0.32  | 5.18   |         | c                           |
|                           | subsp. <i>lagascae</i>      | 6x           | 3.80-5.10   | 4.59  | 0.39  | 8.50   |         | a                           |
|                           |                             | 8x           | 4.60-5.97   | 5.21  | 0.38  | 7.29   |         | b                           |
|                           |                             | 10x          | 4.95-5.78   | 5.31  | 0.27  | 5.08   |         | b                           |
| Awn lemma length (mm)     | subsp. <i>summilusitana</i> | 10x          | 0.60-2.47   | 1.41  | 0.44  | 31.21  | < 0.001 | a<br>b<br>b<br>a<br>b<br>b  |
|                           |                             | 12x          | 1.10-2.50   | 1.71  | 0.36  | 21.05  |         |                             |
|                           |                             | 14x          | 0.62-2.10   | 1.55  | 0.36  | 23.23  |         |                             |
|                           | subsp. <i>lagascae</i>      | 6x           | 1.00-2.50   | 1.73  | 0.43  | 24.86  |         |                             |
|                           |                             | 8x           | 1.07-2.80   | 1.86  | 0.44  | 23.66  |         |                             |
|                           |                             | 10x          | 1.60-2.84   | 2.02  | 0.48  | 23.76  |         |                             |
| Anther length (mm)        | subsp. <i>summilusitana</i> | 10x          | 2.20-3.20   | 2.66  | 0.28  | 10.53  | < 0.001 | a<br>b<br>b<br>a<br>b<br>b  |
|                           |                             | 12x          | 2.30-3.40   | 2.88  | 0.30  | 10.42  |         |                             |
|                           |                             | 14x          | 2.50-3.80   | 3.07  | 0.28  | 9.12   |         |                             |
|                           | subsp. <i>lagascae</i>      | 6x           | 1.60-3.00   | 2.52  | 0.36  | 14.29  |         |                             |
|                           |                             | 8x           | 2.07-3.10   | 2.56  | 0.27  | 10.55  |         |                             |
|                           |                             | 10x          | 2.20-2.90   | 2.59  | 0.24  | 9.27   |         |                             |
| Inflorescence length (cm) | subsp. <i>summilusitana</i> | 10x          | 3.88-8.70   | 6.06  | 1.37  | 22.61  | 0.002   | a<br>b<br>b<br>a<br>b<br>b  |
|                           |                             | 12x          | 3.30-8.80   | 6.14  | 1.49  | 24.27  |         |                             |
|                           |                             | 14x          | 4.00-9.00   | 6.12  | 1.19  | 19.44  |         |                             |
|                           | subsp. <i>lagascae</i>      | 6x           | 2.55-5.00   | 3.59  | 0.65  | 18.11  |         |                             |
|                           |                             | 8x           | 2.40-6.00   | 4.25  | 0.86  | 20.24  |         |                             |
|                           |                             |              |             |       |       |        |         |                             |

|                                 |                             |     |           |       |      |       |         |   |
|---------------------------------|-----------------------------|-----|-----------|-------|------|-------|---------|---|
|                                 |                             | 10x | 4.40-5.00 | 4.71  | 0.22 | 4.67  |         | b |
| <b>First nude length (cm)</b>   |                             | 10x | 1.20-3.00 | 2.12  | 0.49 | 23.11 |         |   |
|                                 | subsp. <i>summilusitana</i> | 12x | 0.90-4.20 | 2.09  | 0.68 | 32.54 |         |   |
|                                 |                             | 14x | 1.20-2.60 | 1.84  | 0.42 | 22.83 |         |   |
|                                 |                             | 6x  | 0.50-1.30 | 0.96  | 0.18 | 18.75 | < 0.001 | a |
|                                 | subsp. <i>lagascae</i>      | 8x  | 0.70-1.60 | 1.17  | 0.22 | 18.80 |         | b |
|                                 |                             | 10x | 1.20-1.80 | 1.43  | 0.26 | 18.18 |         | b |
| <b>Nodes number</b>             |                             | 10x | 7-14      | 10.24 | 2.19 | 21.39 |         |   |
|                                 | subsp. <i>summilusitana</i> | 12x | 6-14      | 9.79  | 1.93 | 19.71 |         |   |
|                                 |                             | 14x | 8-13      | 9.81  | 1.17 | 11.93 |         |   |
|                                 |                             | 6x  | 5-11      | 7.53  | 1.55 | 20.58 |         |   |
|                                 | subsp. <i>lagascae</i>      | 8x  | 6-12      | 9.13  | 1.60 | 17.52 |         |   |
|                                 |                             | 10x | 8-10      | 9.00  | 0.63 | 7.00  |         |   |
| <b>Branches number</b>          |                             | 10x | 1-5       | 3.00  | 0.94 | 31.33 |         |   |
|                                 | subsp. <i>summilusitana</i> | 12x | 2-5       | 2.79  | 1.08 | 38.71 |         |   |
|                                 |                             | 14x | 1-5       | 3.05  | 0.92 | 30.16 |         |   |
|                                 |                             | 6x  | 1-3       | 2.18  | 0.64 | 29.36 |         |   |
|                                 | subsp. <i>lagascae</i>      | 8x  | 1-5       | 2.84  | 1.19 | 41.90 |         |   |
|                                 |                             | 10x | 2-3       | 2.33  | 0.52 | 22.32 |         |   |
| <b>First branch length (cm)</b> |                             | 10x | 1.50-3.70 | 2.91  | 0.34 | 11.68 |         |   |
|                                 | subsp. <i>summilusitana</i> | 12x | 1.70-3.80 | 2.58  | 0.33 | 12.79 |         |   |
|                                 |                             | 14x | 1.80-3.50 | 2.59  | 0.37 | 14.29 |         |   |
|                                 |                             | 6x  | 1.00-2.10 | 1.45  | 0.63 | 43.45 | < 0.001 | a |
|                                 | subsp. <i>lagascae</i>      | 8x  | 1.30-2.80 | 1.97  | 0.62 | 31.47 |         | b |
|                                 |                             | 10x | 1.50-2.40 | 2.08  | 0.50 | 24.04 |         | b |
| <b>Seed length (mm)</b>         |                             | 10x | -         | -     | -    | -     |         |   |
|                                 | subsp. <i>summilusitana</i> | 12x | 2.10-4.00 | 3.49  | 0.28 | 8.02  | < 0.001 | a |
|                                 |                             | 14x | 2.20-4.50 | 3.79  | 0.46 | 12.14 |         | b |
|                                 |                             | 6x  | -         | -     | -    | -     |         |   |
|                                 | subsp. <i>lagascae</i>      | 8x  | 1.60-3.70 | 2.80  | 0.42 | 15.00 | 0.002   | a |
|                                 |                             | 10x | 2.00-3.90 | 3.03  | 0.37 | 12.21 |         | b |
